# Supplementary material
Source: PubMed Central journal article supplement (PMC6492524)
Supplement: ced-0045-0279-s02.pdf [file ced-0045-0279-s02.pdf]

**Supplemental Table I.** Search syntax

| <b>Database</b>  | <b>Search term</b>                                                                                                                                                                                                                                                                                                                                                                       |
|------------------|------------------------------------------------------------------------------------------------------------------------------------------------------------------------------------------------------------------------------------------------------------------------------------------------------------------------------------------------------------------------------------------|
| PubMed           | ((“ischemic stroke”[Title/Abstract] OR “ischaemic stroke”[Title/Abstract] OR “brain infarct”[Title/Abstract]) AND (“determinant”[Title/Abstract] OR “determinants”[Title/Abstract] OR “risk factor”[Title/Abstract] OR “risk factors”[Title/Abstract] OR “predictor”[Title/Abstract] OR “predictors”[Title/Abstract]) AND (“recurrence”[Title/Abstract] OR “recurrent”[Title/Abstract])) |
| EMBASE           | Replaced [Title/Abstract] with :ti,ab                                                                                                                                                                                                                                                                                                                                                    |
| Cochrane Library | Removed [Title/Abstract]                                                                                                                                                                                                                                                                                                                                                                 |
| CINAHL           | Removed [Title/Abstract]                                                                                                                                                                                                                                                                                                                                                                 |
