# Supplementary material
Source: PubMed Central journal article supplement (PMC6492524)
Supplement: ced-0045-0279-s03.pdf [file ced-0045-0279-s03.pdf]

**Supplemental Table II.** Quality assessment score

| <b>Characteristic</b>                         |                                                                                                       | <b>Points</b> |
|-----------------------------------------------|-------------------------------------------------------------------------------------------------------|---------------|
| <u>Design</u>                                 |                                                                                                       |               |
| Study design                                  | Prospective                                                                                           | 3             |
|                                               | Retrospective from prospective database                                                               | 2             |
|                                               | Retrospective                                                                                         | 1             |
|                                               | Case control                                                                                          | 0             |
| <u>Selection</u>                              |                                                                                                       |               |
| Representativeness of the exposed cohort      | Representative of the average ischemic stroke population                                              | 1             |
|                                               | Selected group of the ischemic stroke population                                                      | 0             |
| Selection of the non-exposed cohort           | Drawn from the same community as the exposed cohort                                                   | 1             |
|                                               | Drawn from a different source                                                                         | 0             |
| Ascertainment of exposure                     | Secure record or structured interview                                                                 | 1             |
|                                               | Self-report or no description                                                                         | 0             |
| Outcome was not present at study start        | Yes                                                                                                   | 1             |
|                                               | No                                                                                                    | 0             |
| <u>Comparability</u>                          |                                                                                                       |               |
| Univariable analysis                          | Both crude data and estimates* with 95% CI were provided                                              | 2             |
|                                               | Crude data or estimates* with 95% CI were provided                                                    | 1             |
|                                               | No crude data or estimates* were provided                                                             | 0             |
| Multivariable analysis and confounding        | Contained important potential confounders and rule of ten events per variable was respected           | 2             |
|                                               | Contained important potential confounders or rule of ten events per variable was respected            | 1             |
|                                               | Did not contain important potential confounders and rule of ten events per variable was not respected | 0             |
| <u>Outcome</u>                                |                                                                                                       |               |
| Outcome definition                            | Recurrent ischemic stroke was defined                                                                 | 1             |
|                                               | Unclearly defined or other definition than recurrent ischemic stroke                                  | 0             |
| Assessment of outcome                         | Independent blind assessment or record linkage                                                        | 1             |
|                                               | Self-report or no description                                                                         | 0             |
| Adequate follow-up duration ( $\geq 90$ days) | Yes                                                                                                   | 1             |
|                                               | No                                                                                                    | 0             |
| Adequacy of follow-up of cohorts              | $\leq 10\%$ or description of those lost                                                              | 1             |
|                                               | $>10\%$ or no description of those lost                                                               | 0             |
| <b>Maximum score</b>                          |                                                                                                       | <b>15</b>     |

\*estimates include risk ratios, odds ratios or hazard ratios
