# Supplementary material
Source: PubMed Central journal article supplement (PMC6492524)
Supplement: ced-0045-0279-s04.pdf [file ced-0045-0279-s04.pdf]

**Supplemental Table III.** Used definitions of imaging factors

| <b>Imaging factor</b>      | <b>Study</b> | <b>Study variable</b>                              | <b>Used definition</b>                                                                                                                                                                                                                                                                                                                                                              |
|----------------------------|--------------|----------------------------------------------------|-------------------------------------------------------------------------------------------------------------------------------------------------------------------------------------------------------------------------------------------------------------------------------------------------------------------------------------------------------------------------------------|
| Multiple lesions           | Ay 2010      | Multiple acute infarcts                            | Multiple noncontiguous lesions that were hyperintense on DWI and hypointense on ADC maps                                                                                                                                                                                                                                                                                            |
|                            | Nam 2017     | Multiple number lesion                             | On DWI, not further defined                                                                                                                                                                                                                                                                                                                                                         |
| Multiple stage lesions     | Ay 2010      | Multiple infarcts of different ages                | Ischemic lesions with hyperintense signal on DWI that met at least 2 of the following 3 combinations of signal changes on ADC and FLAIR images:<br>- Hypointense on ADC, isointense on FLAIR (hyperacute)<br>- Hypointense on ADC, hyperintense on FLAIR (early acute)<br>- Isointense on ADC, hyperintense on FLAIR (late acute or subacute)                                       |
|                            | Nam 2017     | Multiple stage lesion                              | On DWI, not further defined                                                                                                                                                                                                                                                                                                                                                         |
| Multiple territory lesions | Ay 2010      | Simultaneous involvement of different circulations | Multiple acute ischemic lesions secondary to acute or subacute infarcts in both right and left anterior circulations or in both anterior and posterior circulations                                                                                                                                                                                                                 |
|                            | Nam 2017     | Multiple territory lesion                          | On DWI, not further defined                                                                                                                                                                                                                                                                                                                                                         |
| Chronic infarcts           | Ay 2010      | Chronic infarcts                                   | Clinically silent or symptomatic territorial lesions that were hyperintense on FLAIR and hypo- or isointense on DWI                                                                                                                                                                                                                                                                 |
|                            | Kim 2014     | Chronic infarcts on MRI                            | Discrete territorial brain lesions with well-defined borders that seemed hyperintense on FLAIR images                                                                                                                                                                                                                                                                               |
| Isolated cortical lesion   | Ay 2010      | Isolated cortical infarcts                         | Not further defined                                                                                                                                                                                                                                                                                                                                                                 |
|                            | Nam 2017     | Isolated cortical lesion                           | On DWI, not further defined                                                                                                                                                                                                                                                                                                                                                         |
| White matter lesions       | Kim 2014     | Extensive leukoaraiosis                            | Leukoaraiosis was defined as hyperintense lesions on axial T2 fluid-attenuated inversion recovery (FLAIR) images that are located in the region starting at the lateral ventricular border and extending up to the corticomedullary junction. Leukoaraiosis was dichotomized according to its severity as mild (Fazekas scores of 0 or 1) and extensive (Fazekas scores, $\geq 2$ ) |
|                            | Nam 2017     | Severe white matter lesions                        | WMH were rated on fluid-attenuated inversion recovery images using the Fazekas scale in peri-ventricular and subcortical areas, respectively. The score was then summed up in two areas and dichotomized into mild (0–2) and severe (3–6) WMH                                                                                                                                       |

DWI: diffusion weighted imaging, ADC: apparent diffusion coefficient, FLAIR: fluid attenuation inversion recovery, MRI: magnetic resonance imaging, WMH: white matter hyperintensities.
