# Supplementary material
Source: PubMed Central journal article supplement (PMC6492524)
Supplement: ced-0045-0279-s05.pdf [file ced-0045-0279-s05.pdf]

**Supplemental Table IV.** Predictive factors for recurrent ischemic stroke including low quality studies

| Predictive factor                                  | Study            | Sample size, n | Variable definition                                                             | Factor prevalence | Follow-up duration | uv RR (95% CI)       | mv HR (95% CI)   |
|----------------------------------------------------|------------------|----------------|---------------------------------------------------------------------------------|-------------------|--------------------|----------------------|------------------|
| <b>Clinical factors</b>                            |                  |                |                                                                                 |                   |                    |                      |                  |
| <i>Strong level</i>                                |                  |                |                                                                                 |                   |                    |                      |                  |
| Prior stroke/TIA<br>I <sup>2</sup> =0%             | Ay 2010          | 1458           | -                                                                               | 8%                | 90 days            | 3.4 (2.1-5.6)        |                  |
|                                                    | Bergström 2017   | 196,765        | Prior ischemic stroke                                                           | 15%               | 1 year             |                      | 1.3 (1.2-1.4)    |
|                                                    | Kim 2014         | 2378           | Within last month                                                               | 14%               | 90 days            | 2.6 (1.9-3.4)        |                  |
|                                                    | Kuwashiro 2012   | 260            | Prior ischemic stroke                                                           | 24%               | 12 months          | 1.8 (1.1-3.1)        | OR 2.0 (0.8-5.0) |
|                                                    | Soda 2004        | 713            | Prior stroke/TIA                                                                | 27%               | 12 months          | 2.3 (1.5-3.8)        |                  |
|                                                    | <b>Pooled</b>    |                |                                                                                 |                   |                    |                      |                  |
| Small vessel disease vs LAA<br>I <sup>2</sup> =82% | Ay 2010          | 1458           | CCS                                                                             | 10%               | 90 days            | 0.1 (0.0-0.7)        |                  |
|                                                    | Grau 2001        | 5017           | TOAST                                                                           | 20%               | 7 days             | 0.4 (0.3-0.6)        |                  |
|                                                    | Hankey 1998      | 250            | Lacunar syndrome                                                                | 10%               | 7 days             | 1.4 (0.6-3.4)        |                  |
|                                                    | Nam 2017         | 959            | TOAST                                                                           | 31%               | 31 months          | 0.1 (0.0-0.3)        |                  |
|                                                    | Kim 2014         | 2378           | CCS                                                                             | 12%               | 90 days            | 0.3 (0.1-0.9)        |                  |
|                                                    | Kuwashiro 2012   | 260            | TOAST                                                                           | 31%               | 12 months          | 0.5 (0.3-1.0)        |                  |
|                                                    | Omori 2015       | 991            | Clinical subtype                                                                | 32%               | 704 days           | 1.3 (0.9-1.7)        |                  |
|                                                    | Soda 2004        | 745            | NINDS                                                                           | 26%               | 12 months          | 0.8 (0.4-1.7)        |                  |
|                                                    | Suanprasert 2011 | 234            | TOAST                                                                           | 61%               | 13 months          | 1.0 (0.7-1.6)        |                  |
|                                                    | <b>Pooled</b>    |                |                                                                                 |                   |                    |                      |                  |
|                                                    |                  |                |                                                                                 |                   |                    | <b>0.6 (0.3-0.9)</b> |                  |
| <i>Moderate level</i>                              |                  |                |                                                                                 |                   |                    |                      |                  |
| Undetermined cause vs LAA<br>I <sup>2</sup> =65%   | Ay 2010          | 1458           | CCS                                                                             | 36%               | 90 days            | 0.4 (0.2-0.7)        |                  |
|                                                    | Grau 2001        | 5017           | TOAST                                                                           | 23%               | 7 days             | 0.4 (0.3-0.6)        |                  |
|                                                    | Kim 2014         | 2378           | CCS                                                                             | 12%               | 90 days            | 0.2 (0.1-0.5)        |                  |
|                                                    | Soda 2004        | 745            | NINDS:<br>Uncertain cause                                                       | 22%               | 12 months          | 1.1 (0.5-2.2)        |                  |
|                                                    | <b>Pooled</b>    |                |                                                                                 |                   |                    |                      |                  |
|                                                    |                  |                |                                                                                 |                   |                    | <b>0.5 (0.3-0.8)</b> |                  |
| <b>Imaging factors (MRI)</b>                       |                  |                |                                                                                 |                   |                    |                      |                  |
| <i>Moderate level</i>                              |                  |                |                                                                                 |                   |                    |                      |                  |
| Multiple lesions<br>I <sup>2</sup> =0%             | Ay 2010          | 1458           | Hyperintense on DWI and hypointense on ADC maps                                 | 40%               | 90 days            | 1.8 (1.5-2.1)        |                  |
|                                                    | Nam 2017         | 959            | On DWI                                                                          | 39%               | 31 months          | 1.6 (1.3-2.0)        |                  |
|                                                    | <b>Pooled</b>    |                |                                                                                 |                   |                    |                      |                  |
|                                                    |                  |                |                                                                                 |                   |                    | <b>1.7 (1.5-2.0)</b> |                  |
| Multiple stage lesions<br>I <sup>2</sup> =16%      | Ay 2010          | 1458           | Multiple infarcts of different ages on ADC/FLAIR                                | 11%               | 90 days            | 3.5 (2.4-5.2)        |                  |
|                                                    | Nam 2017         | 959            | On DWI                                                                          | 11%               | 31 months          | 4.7 (3.3-6.7)        | 6.0 (3.5-10.1)   |
|                                                    | <b>Pooled</b>    |                |                                                                                 |                   |                    |                      |                  |
|                                                    |                  |                |                                                                                 |                   |                    | <b>4.1 (3.1-5.5)</b> |                  |
| Multiple territory lesions<br>I <sup>2</sup> =0%   | Ay 2010          | 1458           | (sub)acute in right and left anterior circulations or in anterior and posterior | 10%               | 90 days            | 2.7 (1.7-4.4)        |                  |
|                                                    | Nam 2017         | 959            | On DWI                                                                          | 6%                | 31 months          | 3.2 (1.8-5.8)        |                  |
|                                                    | <b>Pooled</b>    |                |                                                                                 |                   |                    |                      |                  |
|                                                    |                  |                |                                                                                 |                   |                    | <b>2.9 (2.0-4.2)</b> |                  |
| Chronic infarcts<br>I <sup>2</sup> =0%             | Ay 2010          | 1458           | Hyperintense on FLAIR and hypo-/isointense on DWI                               | 30%               | 90 days            | 1.4 (1.1-2.0)        |                  |
|                                                    | Kim 2014         | 2378           | On MRI                                                                          | 15%               | 90 days            | 1.6 (1.1-2.3)        | 1.4 (0.9-2.3)    |
|                                                    | <b>Pooled</b>    |                |                                                                                 |                   |                    |                      |                  |
|                                                    |                  |                |                                                                                 |                   |                    | <b>1.5 (1.2-1.9)</b> |                  |
| Isolated cortical lesion<br>I <sup>2</sup> =0%     | Ay 2010          | 1458           | -                                                                               | 9%                | 90 days            | 2.2 (1.3-3.8)        |                  |
|                                                    | Nam 2017         | 959            | On DWI                                                                          | 9%                | 31 months          | 2.1 (1.2-3.8)        | 2.5 (1.3-5.0)    |
|                                                    | <b>Pooled</b>    |                |                                                                                 |                   |                    |                      |                  |
|                                                    |                  |                |                                                                                 |                   |                    | <b>2.2 (1.5-3.2)</b> |                  |
| <i>Limited level</i>                               |                  |                |                                                                                 |                   |                    |                      |                  |
| White matter lesions<br>I <sup>2</sup> =89%        | Kim 2014         | 2378           | FLAIR: Fazekas <2 vs ≥2                                                         | 44%               | 90 days            | 1.2 (1.0-1.5)        | 1.5 (1.0-2.3)    |
|                                                    | Nam 2017         | 959            | FLAIR: Fazekas ≤2 vs >2                                                         | 25%               | 31 months          | 2.0 (1.5-2.7)        | 1.9 (1.1-3.4)    |
|                                                    | <b>Pooled</b>    |                |                                                                                 |                   |                    |                      |                  |
|                                                    |                  |                |                                                                                 |                   |                    | <b>1.5 (0.9-2.6)</b> |                  |

uv.: univariable, RR: risk ratio, CI: confidence interval, mv.: multivariable, HR: hazard ratio, TIA: transient ischemic attack, OR: odds ratio, LAA: large artery atherosclerosis, CCS: Causative Classification System for Ischemic Stroke, TOAST: Trial of ORG 10172 in Acute Stroke Treatment, NINDS: National Institute of Neurological Diseases and Stroke, MRI: magnetic resonance imaging, DWI: diffusion weighted imaging, ADC: apparent diffusion coefficient, FLAIR: fluid attenuation inversion recovery.
