# Supplementary material
Source: PubMed Central journal article supplement (PMC6492524)
Supplement: ced-0045-0279-s06.pdf [file ced-0045-0279-s06.pdf]

**Supplemental Table V.** Non-predictive factors of recurrent ischemic stroke

| Non-predictive factor              | Study                               | Sample size, n | Variable definition                                                                                        | Factor prevalence                                                                         | Follow-up duration | uv RR (95% CI)       | mv HR (95% CI)       |               |
|------------------------------------|-------------------------------------|----------------|------------------------------------------------------------------------------------------------------------|-------------------------------------------------------------------------------------------|--------------------|----------------------|----------------------|---------------|
| <i>Strong level</i>                |                                     |                |                                                                                                            |                                                                                           |                    |                      |                      |               |
| Male sex<br>I <sup>2</sup> =0%     | Ay 2010                             | 1458           | -                                                                                                          | 54%                                                                                       | 90 days            | 1.1 (0.8-1.3)        |                      |               |
|                                    | Bergström 2017                      | 196,765        | -                                                                                                          | 50%                                                                                       | 1 year             |                      | 1.0 (1.0-1.1)        |               |
|                                    | Buenaflo 2017                       | 1155           | -                                                                                                          | 53%                                                                                       | 3 years            | 1.0 (0.9-1.2)        |                      |               |
|                                    | Kim 2014                            | 2378           | -                                                                                                          | 54%                                                                                       | 90 days            | 1.0 (0.8-1.2)        |                      |               |
|                                    | Kuwashiro 2012                      | 260            | -                                                                                                          | 58%                                                                                       | 12 months          | 1.2 (0.9-1.6)        | OR 1.7 (0.7-4.7)     |               |
|                                    | Lee 2004                            | 7816           | -                                                                                                          | 51%                                                                                       | 4 years            |                      | 1.2 (1.0-1.3)        |               |
|                                    | Nam 2017                            | 959            | -                                                                                                          | 62%                                                                                       | 31 months          | 1.0 (0.8-1.2)        |                      |               |
|                                    | Soda 2004                           | 745            | -                                                                                                          | 58%                                                                                       | 12 months          | 0.9 (0.7-1.1)        |                      |               |
|                                    | <b>Pooled</b>                       |                |                                                                                                            |                                                                                           |                    |                      | <b>1.0 (0.9-1.1)</b> |               |
|                                    | Hypertension<br>I <sup>2</sup> =71% | Ay 2010        | 1458                                                                                                       | -                                                                                         | 70%                | 90 days              | 1.1 (0.9-1.2)        |               |
| Buenaflo 2017                      |                                     | 1155           | Medication; persistent blood pressure >140/90 mmHg                                                         | 95%                                                                                       | 3 years            | 1.0 (0.9-1.0)        |                      |               |
| Kim 2014                           |                                     | 2378           | Medication; repeated ≥140/90mmHg                                                                           | 69%                                                                                       | 90 days            | 1.2 (1.1-1.3)        |                      |               |
| Kuwashiro 2012                     |                                     | 260            | Medication; SBP≥140;DBP≥90                                                                                 | 80%                                                                                       | 12 months          | 1.0 (0.8-1.2)        |                      |               |
| Nam 2017                           |                                     | 959            | -                                                                                                          | 66%                                                                                       | 31 months          | 0.9 (0.8-1.2)        |                      |               |
| Soda 2004                          |                                     | 736            | Medication; >140/90 mmHg; also at two following occasions after index stroke                               | 68%                                                                                       | 12 months          | 1.2 (1.0-1.3)        |                      |               |
| Lai 1994                           |                                     | 621            | Medical history of hypertension                                                                            | 59%                                                                                       | 24 months          |                      | 2.0 (1.2-3.2)        |               |
| Lee 2004                           |                                     | 7816           | -                                                                                                          | 62%                                                                                       | 4 years            |                      | 1.1 (0.9-1.2)        |               |
| <b>Pooled</b>                      |                                     |                |                                                                                                            |                                                                                           |                    | <b>1.1 (1.0-1.2)</b> |                      |               |
| Dyslipidemia<br>I <sup>2</sup> =0% |                                     | Buenaflo 2017  | 1155                                                                                                       | Medication; total chol≥240mg/dL;LDL≥160mg/dL                                              | 36%                | 3 years              | 1.1 (0.9-1.3)        |               |
|                                    | Kuwashiro 2012                      | 260            | Medication; total chol≥220mg/dL                                                                            | 41%                                                                                       | 12 months          | 0.9 (0.5-1.5)        |                      |               |
|                                    | Lee 2004                            | 7816           | -                                                                                                          | 15%                                                                                       | 4 years            |                      | 0.9 (0.7-1.1)        |               |
|                                    | Nam 2017                            | 959            | -                                                                                                          | 31%                                                                                       | 31 months          | 0.9 (0.6-1.3)        |                      |               |
|                                    | Soda 2004                           | 709            | Fasting total cholesterol >5.7 mmol/L, fasting triglycerides >1.70 mmol/L, or HDL cholesterol <1.04 mmol/L | 39%                                                                                       | 12 months          | 1.4 (0.9-2.3)        |                      |               |
|                                    | <b>Pooled</b>                       |                |                                                                                                            |                                                                                           |                    |                      | <b>1.1 (0.9-1.2)</b> |               |
|                                    | DM<br>I <sup>2</sup> =39%           | Alter 1997     | 621                                                                                                        | History of DM; medication; diet; elevated HbA1c (>6.2%)                                   | 32%                | 24 months            | 1.1 (0.8-1.6)        |               |
|                                    |                                     | Ay 2010        | 1458                                                                                                       | -                                                                                         | 24%                | 90 days              | 0.9 (0.6-1.5)        |               |
|                                    |                                     | Bergström 2017 | 196,765                                                                                                    | -                                                                                         | 21%                | 1 year               |                      | 1.2 (1.1-1.3) |
|                                    |                                     | Buenaflo 2017  | 1155                                                                                                       | Medication; fasting glucose≥7mmol/L; symptoms plus random glucose≥11.1mmol/L; HbA1c>6.5%) | 25%                | 3 years              | 0.8 (0.6-1.0)        |               |
| Kim 2014                           |                                     | 2378           | Medication; repeated fasting glucose ≥126 mg/dL                                                            | 23%                                                                                       | 90 days            | 1.0 (0.7-1.4)        |                      |               |
| Kuwashiro 2012                     |                                     | 260            | Medication; fasting glucose≥126mg/dL; positive 75g oral glucose tolerance test result                      | 34%                                                                                       | 12 months          | 1.5 (0.9-2.3)        |                      |               |
| Nam 2017                           |                                     | 959            | -                                                                                                          | 30%                                                                                       | 31 months          | 1.3 (1.0-1.8)        |                      |               |
| Soda 2004                          |                                     | 742            | Fasting glucose >7.0 mmol/l, positive 75g oral glucose tolerance test result, or HbA1c >6.5%               | 34%                                                                                       | 12 months          | 1.2 (0.7-1.9)        |                      |               |
| Lee 2004                           |                                     | 7816           | -                                                                                                          | 22%                                                                                       | 4 years            |                      | 1.3 (1.1-1.5)        |               |
| <b>Pooled</b>                      |                                     |                |                                                                                                            |                                                                                           |                    | <b>1.1 (0.9-1.3)</b> |                      |               |
| AF<br>I <sup>2</sup> =18%          | Ay 2010                             | 1458           | -                                                                                                          | 30%                                                                                       | 90 days            | 0.8 (0.5-1.3)        |                      |               |
|                                    | Buenaflo 2017                       | 1155           | By ECG or 24h Holter                                                                                       | 17%                                                                                       | 3 years            | 0.9 (0.7-1.3)        |                      |               |
|                                    | Lai 1994                            | 621            | AF by ECG                                                                                                  | 16%                                                                                       | 24 months          |                      | 1.8 (1.0-3.1)        |               |
|                                    | Lee 2004                            | 7816           | -                                                                                                          | 23%                                                                                       | 4 years            |                      | 1.0 (0.9-1.2)        |               |
|                                    | Kim 2014                            | 2378           | -                                                                                                          | 25%                                                                                       | 90 days            | 0.9 (0.6-1.2)        |                      |               |
|                                    | Kuwashiro 2012                      | 260            | -                                                                                                          | 20%                                                                                       | 12 months          | 1.7 (0.9-3.1)        |                      |               |
|                                    | Nam 2017                            | 959            | -                                                                                                          | 14%                                                                                       | 31 months          | 1.2 (0.7-2.2)        |                      |               |
|                                    | <b>Pooled</b>                       |                |                                                                                                            |                                                                                           |                    |                      | <b>1.0 (0.8-1.2)</b> |               |
|                                    | Anticoagulant<br>I <sup>2</sup> =0% | Ay 2010        | 1458                                                                                                       | -                                                                                         | 41%                | 90 days              | 1.0 (0.8-1.4)        |               |
|                                    |                                     | Kim 2014       | 2378                                                                                                       | -                                                                                         | 37%                | 90 days              | 1.1 (0.9-1.4)        |               |
| Kuwashiro 2012                     |                                     | 260            | -                                                                                                          | 23%                                                                                       | 12 months          | 1.0 (0.5-2.2)        |                      |               |
| Nam 2017                           |                                     | 959            | -                                                                                                          | 13%                                                                                       | 31 months          | 0.9 (0.4-1.8)        |                      |               |
| Soda 2004                          |                                     | 745            | 1 year after index or during recurrent stroke                                                              | 18%                                                                                       | 12 months          | 1.1 (0.6-2.0)        |                      |               |
| <b>Pooled</b>                      |                                     |                |                                                                                                            |                                                                                           |                    | <b>1.1 (0.9-1.3)</b> |                      |               |

|                                                   |                |      |                                                                          |     |                      |                      |
|---------------------------------------------------|----------------|------|--------------------------------------------------------------------------|-----|----------------------|----------------------|
| Antiplatelet<br>I <sup>2</sup> =0%                | Ay 2010        | 1458 | -                                                                        | 67% | 90 days              | 1.0 (0.9-1.2)        |
|                                                   | Kim 2014       | 2378 | -                                                                        | 70% | 90 days              | 1.0 (0.9-1.1)        |
|                                                   | Kuwashiro 2012 | 260  | -                                                                        | 76% | 12 months            | 1.1 (0.9-1.3)        |
|                                                   | Nam 2017       | 959  | -                                                                        | 90% | 31 months            | 1.0 (0.9-1.1)        |
|                                                   | <b>Pooled</b>  |      |                                                                          |     |                      | <b>1.0 (1.0-1.1)</b> |
| Statin<br>I <sup>2</sup> =0%                      | Ay 2010        | 1458 | -                                                                        | 56% | 90 days              | 0.9 (0.7-1.1)        |
|                                                   | Kim 2014       | 2378 | -                                                                        | 66% | 90 days              | 1.0 (0.9-1.2)        |
|                                                   | Nam 2017       | 959  | -                                                                        | 71% | 31 months            | 1.0 (0.8-1.2)        |
|                                                   | <b>Pooled</b>  |      |                                                                          |     |                      | <b>1.0 (0.9-1.1)</b> |
| <i>Moderate level</i>                             |                |      |                                                                          |     |                      |                      |
| Alcohol<br>I <sup>2</sup> =0%                     | Buenaflo 2017  | 1155 | ≥5 drinks on same occasion on each of 5 or more days in the past 30 days | 8%  | 3 years              | 0.7 (0.4-1.2)        |
|                                                   | Kuwashiro 2012 | 260  | Consumption (including occasional drinking)                              | 38% | 12 months            | 1.0 (0.6-1.6)        |
|                                                   | Nam 2017       | 959  | -                                                                        | 40% | 31 months            | 1.0 (0.7-1.3)        |
|                                                   | Soda 2004      | 592  | Heavy: >43g/day                                                          | 17% | 12 months            | 0.6 (0.3-1.4)        |
|                                                   | <b>Pooled</b>  |      |                                                                          |     |                      | <b>0.9 (0.7-1.1)</b> |
| Antihypertensive medication<br>I <sup>2</sup> =0% | Kim 2014       | 2378 | -                                                                        | 28% | 90 days              | 1.0 (0.7-1.3)        |
|                                                   | Kuwashiro 2012 | 260  | -                                                                        | 45% | 12 months            | 0.7 (0.4-1.2)        |
|                                                   | Nam 2017       | 959  | -                                                                        | 49% | 31 months            | 1.0 (0.7-1.3)        |
| <b>Pooled</b>                                     |                |      |                                                                          |     | <b>0.9 (0.8-1.1)</b> |                      |
| <i>Limited level</i>                              |                |      |                                                                          |     |                      |                      |
| Other cause vs LAA<br>I <sup>2</sup> =36%         | Ay 2010        | 1458 | CCS                                                                      | 6%  | 90 days              | 2.0 (1.0-3.8)        |
|                                                   | Kim 2014       | 2378 | CCS                                                                      | 8%  | 90 days              | 1.2 (0.8-2.0)        |
|                                                   | Kuwashiro 2012 | 260  | TOAST                                                                    | 27% | 12 months            | 0.5 (0.2-1.4)        |
|                                                   | Nam 2017       | 959  | TOAST                                                                    | 9%  | 31 months            | 1.4 (0.7-2.7)        |
|                                                   | <b>Pooled</b>  |      |                                                                          |     |                      | <b>1.2 (0.8-1.9)</b> |

uv.: univariable, RR: risk ratio, CI: confidence interval, mv.: multivariable, HR: hazard ratio, OR: odds ratio, mmHg: millimeters of mercury, SBP: systolic blood pressure, DBP: diastolic blood pressure, chol: cholesterol, mg: milligrams, dL: deciliter, LDL: low-density lipoprotein, mmol: millimoles, L: liter, HDL: high-density lipoprotein, DM: diabetes mellitus, g: grams, AF: atrial fibrillation, ECG: electrocardiogram, LAA: large artery atherosclerosis, CCS: Causative Classification System for Ischemic Stroke, TOAST: Trial of ORG 10172 in Acute Stroke Treatment.
