# Supplementary material
Source: PubMed Central journal article supplement (PMC6492524)
Supplement: ced-0045-0279-s07.pdf [file ced-0045-0279-s07.pdf]

**Supplemental Table VI. Factors with inconsistent evidence**

| Factor                                     | Study          | Sample size (n) | Definition variable                                         | Patients with predictor (%) | Follow-up duration | uv RR (95% CI)       | mv HR (95% CI) |
|--------------------------------------------|----------------|-----------------|-------------------------------------------------------------|-----------------------------|--------------------|----------------------|----------------|
| Smoking<br>I <sup>2</sup> =14%             | Ay 2010        | 1458            | -                                                           | 21%                         | 90 days            | 1.2 (0.8-1.9)        |                |
|                                            | Buenaflor 2017 | 1155            | Current pipe/cigar or cigarette smoking during index stroke | 15%                         | 3 years            | 0.7 (0.5-1.0)        |                |
|                                            | Kim 2014       | 2378            | Current smoking                                             | 19%                         | 90 days            | 1.0 (0.7-1.5)        |                |
|                                            | Kuwashiro 2012 | 260             | Smoking habit: previous and current                         | 44%                         | 12 months          | 0.9 (0.6-1.5)        |                |
|                                            | Nam 2017       | 959             | Current smoking                                             | 33%                         | 31 months          | 0.8 (0.5-1.2)        |                |
|                                            | Soda 2004      | 606             | Currently or quit <12 months                                | 32%                         | 12 months          | 0.6 (0.3-1.0)        |                |
|                                            | <b>Pooled</b>  |                 |                                                             |                             |                    | <b>0.8 (0.7-1.0)</b> |                |
| CE vs LAA<br>I <sup>2</sup> =84%           | Ay 2010        | 1458            | CCS                                                         | 25%                         | 90 days            | 0.5 (0.3-1.0)        |                |
|                                            | Kim 2014       | 2378            | CCS                                                         | 45%                         | 90 days            | 0.3 (0.2-0.5)        |                |
|                                            | Kuwashiro 2012 | 260             | TOAST                                                       | 18%                         | 12 months          | 0.7 (0.2-1.8)        |                |
|                                            | Nam 2017       | 959             | TOAST                                                       | 17%                         | 31 months          | 1.1 (0.6-2.0)        |                |
|                                            | Soda 2004      | 745             | NINDS                                                       | 22%                         | 12 months          | 2.0 (1.1-3.6)        |                |
|                                            | <b>Pooled</b>  |                 |                                                             |                             |                    | <b>0.7 (0.4-1.5)</b> |                |
| Prior CVD<br>I <sup>2</sup> =NA            | Bergström 2017 | 196,765         | Prior myocardial infarction                                 | 12%                         | 1 year             |                      | 1.3 (1.2-1.3)  |
|                                            | Kuwashiro 2012 | 260             | Ischemic heart disease                                      | 15%                         | 12 months          | 0.5 (0.1-1.9)        |                |
|                                            | Lee 2004       | 7816            | Other cardiac conditions                                    | 49%                         | 4 years            |                      | 1.2 (1.0-1.4)  |
|                                            | <b>Pooled</b>  |                 |                                                             |                             |                    | <b>NA</b>            |                |
| Carotid intervention<br>I <sup>2</sup> =0% | Ay 2010        | 1458            | Carotid endarterectomy/angioplasty/stent                    | 5%                          | 90 days            | 1.1 (0.4-3.4)        |                |
|                                            | Lee 2004       | 7816            | Carotid endarterectomy                                      | 1%                          | 4 years            |                      | 0.6 (0.3-1.3)  |
|                                            | Nam 2017       | 959             | Carotid endarterectomy/stent                                | 1%                          | 31 months          | 2.6 (0.6-11.4)       |                |
|                                            | <b>Pooled</b>  |                 |                                                             |                             |                    | <b>1.5 (0.6-3.7)</b> |                |

uv.: univariable, RR: risk ratio, CI: confidence interval, mv.: multivariable, HR: hazard ratio, CE: cardioembolic, LAA: large artery atherosclerosis, CCS: Causative Classification System for Ischemic Stroke, TOAST: Trial of ORG 10172 in Acute Stroke Treatment, NINDS: National Institute of Neurological Diseases and Stroke, CVD: cardiovascular disease, NA: not applicable.
