# Supplementary material
Source: PubMed Central journal article supplement (PMC6492524)

## ONLINE SUPPLEMENT

**Supplemental Figure I.** Flowchart of systematic literature search

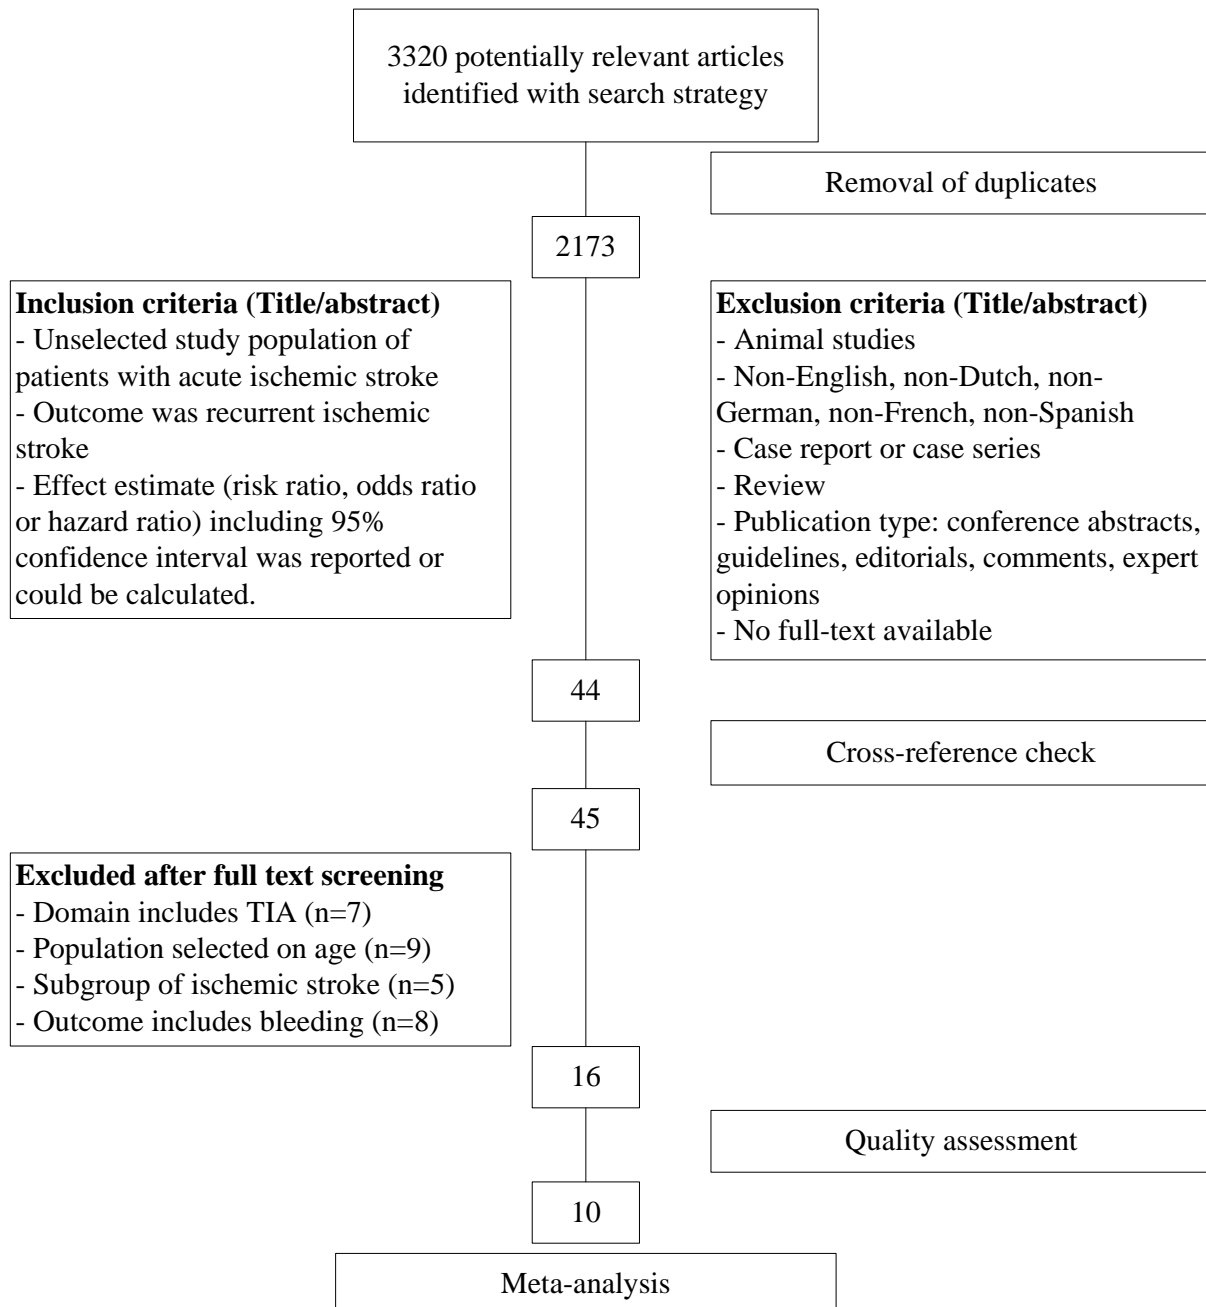

Supplement: ced-0045-0279-s08.pdf [file ced-0045-0279-s08.pdf]
